# Supplementary material for: Experimental Investigation of Polypropylene Composite Drawn Fibers with Talc, Wollastonite, Attapulgite and Single-Wall Carbon Nanotubes
Source: MDPI journal article supplement (doi:10.3390/polym14020260), 2022-01-09
Supplement: s1 [file s1]

# Experimental Investigation of Polypropylene Composite Drawn Fibers with Talc, Wollastonite, Attapulgite and Single Wall Carbon Nanotubes

Costas Tsiptsias<sup>1</sup>, Konstantinos Leontiadis<sup>1</sup>, Stavros Messaritakis<sup>2</sup>, Aikaterini Terzaki<sup>2</sup>, Panagiotis Xidas<sup>3</sup>, Kyriakos Mystikos<sup>3</sup>, Evangelos Tzimpilis<sup>1</sup> and Ioannis Tsivintzelis<sup>1\*</sup>

<sup>1</sup>Department of Chemical Engineering, Aristotle University of Thessaloniki, University Campus, GR-54124, Thessaloniki, Greece.

<sup>2</sup>Plastika Kritis S.A., R Street, Industrial Area of Heraklion, GR-71408, Heraklion, Crete, Greece.

<sup>3</sup>Thrace Nonwovens & Geosynthetics S.A., Magiko, GR-67100, Xanthi, Greece

\*Correspondence: authors, tioannis@cheng.auth.gr (I. Tsivintzelis), ktsiots@gmail.com (Costas Tsiptsias)

In Table S1 some information about the fillers that were used for the preparation of the masterbatches, are given.

**Table S1.** Information for the fillers that were used for the preparation of masterbatches.

| Name                         | Chemical formula                                                                          | Type                        | Size                       |
|------------------------------|-------------------------------------------------------------------------------------------|-----------------------------|----------------------------|
| Microtalc                    | $\text{Mg}_3\text{Si}_4\text{O}_{10}(\text{OH})_2$                                        | Phyllosilicate              | $D_{50} = 1.7 \mu\text{m}$ |
| Ultrafine talc               | $\text{Mg}_3\text{Si}_4\text{O}_{10}(\text{OH})_2$                                        | Phyllosilicate              | $D_{50} = 0.7 \mu\text{m}$ |
| Attapulgite                  | $(\text{Mg}, \text{Al})_2\text{Si}_4\text{O}_{10}(\text{OH}) \cdot 4(\text{H}_2\text{O})$ | Phyllosilicate              |                            |
| Wollastonite                 | $\text{CaSiO}_3$                                                                          | Silicate<br>needle-like     | $D_{50} = 3 \mu\text{m}$   |
| Single wall carbon nanotubes | C                                                                                         | Carbonaceous<br>needle-like |                            |

In Figure S1 a schematic representation of the better dispersion of the antioxidant inside the PP matrix, in presence of the compatibilizer (PP-g-MA), is given. As can be seen, in absence of PP-g-MA the molecules of the phenolic type antioxidant are expected to self-aggregate and, consequently, their dispersion is hindered. In presence of PP-g-MA, the hydrogen bonding between the -OH group of the antioxidant and the oxygens of MA group leads to a better dispersion of the antioxidant molecules into the PP matrix.

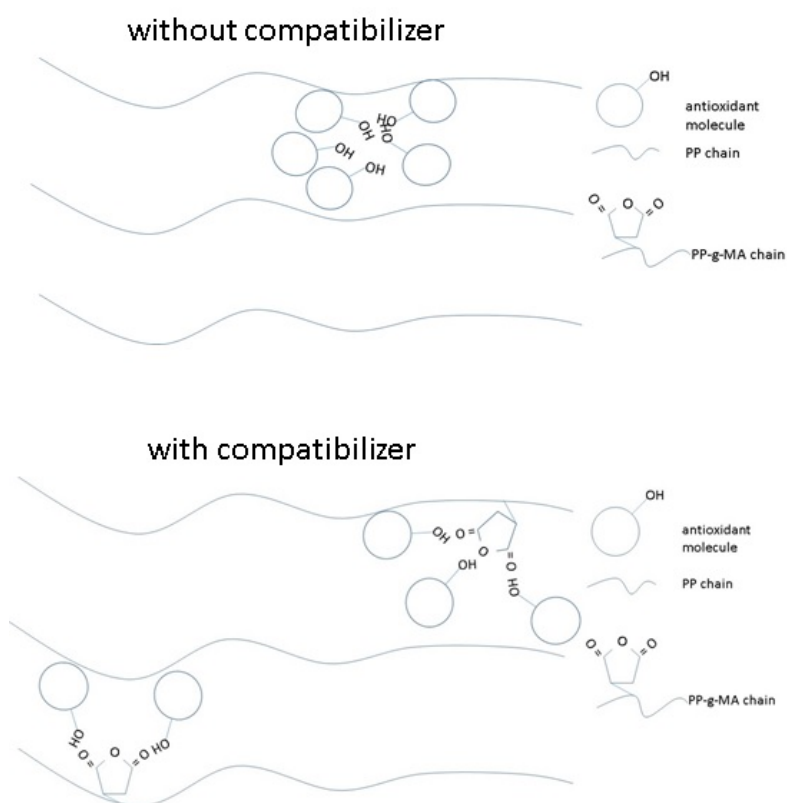

**Figure S1.** Schematic representation of the better antioxidant dispersion in presence of the compatibilizer.

In Figures S2 and S3, images from stereoscope are presented for the PP-AO-MA-AT and PP-AO-WO samples. In the case of the PP-AO-MA-AT sample, aggregates can be rather often detected (indicated by arrows in Figure S2). On the contrary, for the PP-AO-WO sample the observation of aggregates was extremely rare.

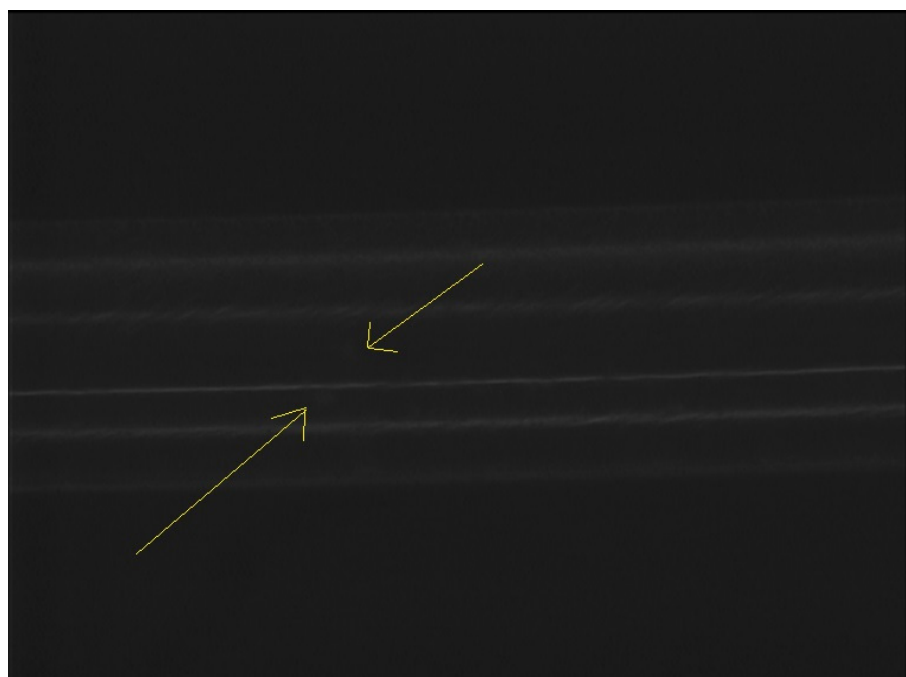

(a)

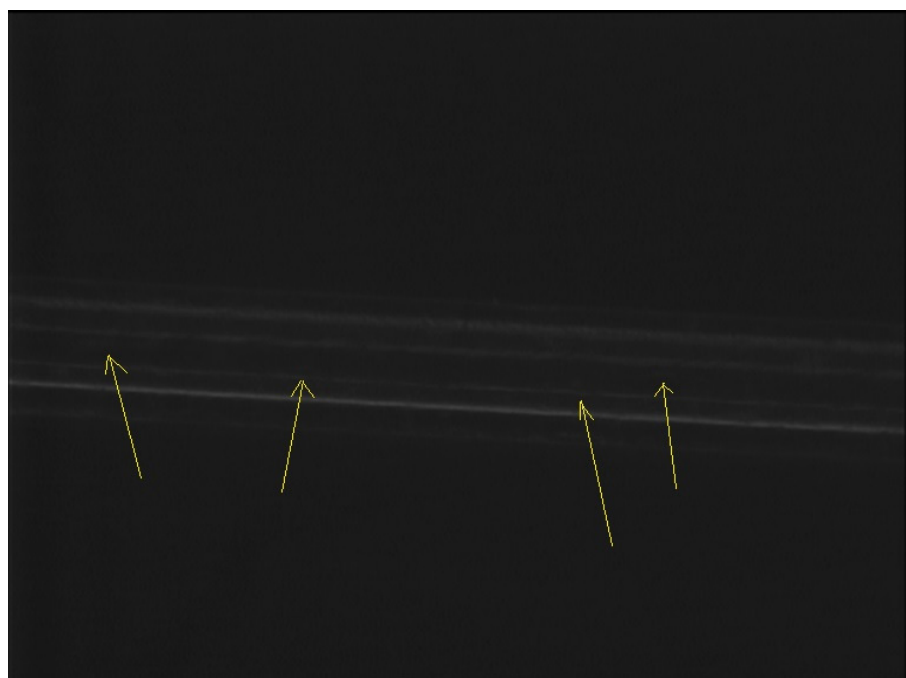

(b)

**Figure S2.** Stereoscope images of the PP-AO-MA-AT sample: (a) before drawing and (b) after drawing. The arrows indicate the presence of agglomerates.

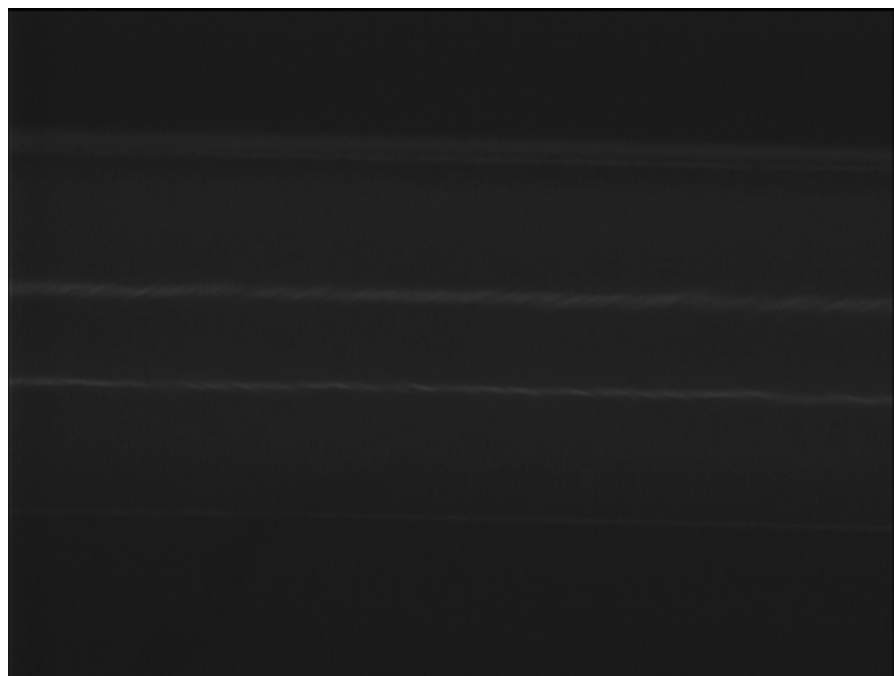

(a)

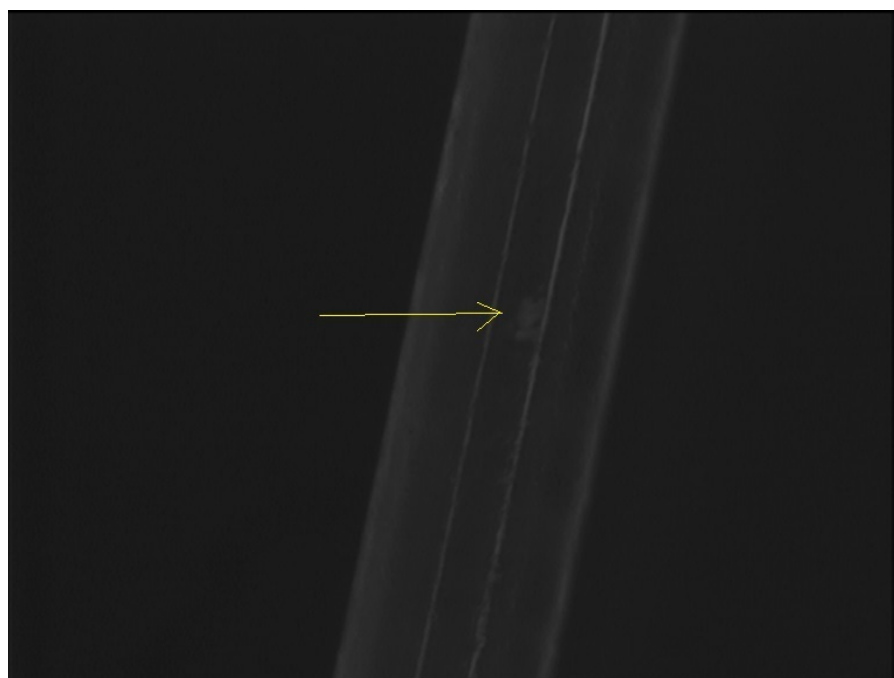

(b)

**Figure S3.** Stereoscope images of non-drawn PP-AO-WO samples: (a) Image showing a representative uniform fiber area and (b) Image showing the presence of agglomerate (very rare and not representative for this composite).
